# Supplementary material
Source: PubMed Central journal article supplement (PMC8804733)
Supplement: sj-pdf-1-car-10.1177_19476035211044822.pdf [file sj-pdf-1-car-10.1177_19476035211044822.pdf]

| Gene symbol | Gene name                                  | First trimester MSC                            |         | Term MSC                                       |             |
|-------------|--------------------------------------------|------------------------------------------------|---------|------------------------------------------------|-------------|
|             |                                            | Fold change in expression (compared to BM-MSC) | p-value | Fold change in expression (compared to BM-MSC) | p-value     |
| ABCB1       | ATP binding cassette subfamily B member 1  | 193.30                                         | 0.21    | 243.87                                         | 0.31        |
| ACTA2       | actin alpha 2, smooth muscle               | 4.57                                           | 0.12    | 2.29                                           | 0.29        |
| ALCAM       | activated leukocyte cell adhesion molecule | 102.13                                         | 0.50    | 530.29                                         | 0.38        |
| ANPEP       | alanyl aminopeptidase, membrane            | 6.81                                           | 0.18    | 18.93                                          | 0.34        |
| ANXA5       | annexin A5                                 | 3.92                                           | 0.38    | 3.46                                           | 0.65        |
| BDNF        | brain-derived neurotrophic factor          | 11.51                                          | 0.13    | 15.48                                          | 0.12        |
| BGLAP       | bone gamma-carboxyglutamate protein        | 1.50                                           | 0.51    | 4.73                                           | 0.10        |
| BMP2        | bone morphogenetic protein 2               | 160.69                                         | 0.31    | 708.66                                         | 0.29        |
| BMP4        | bone morphogenetic protein 4               | 2.54                                           | 0.88    | 17.97                                          | 0.27        |
| BMP6        | bone morphogenetic protein 6               | 7.20                                           | 0.18    | 8.32                                           | 0.17        |
| BMP7        | bone morphogenetic protein 7               | 6.85                                           | 0.48    | 6.16                                           | 0.40        |
| CASP3       | caspase 3                                  | 3.16                                           | 0.27    | 6.28                                           | 0.20        |
| CD44        | CD44 molecule (Indian blood group)         | 0.05                                           | 0.32    | 0.35                                           | 0.36        |
| COL1A1      | collagen, type I, alpha 1                  | 3.07                                           | 0.13    | 346.00                                         | 0.31        |
| CSF2        | colony stimulating factor 2                | 7.40                                           | 0.18    | 15.77                                          | 0.09        |
| CSF3        | colony stimulating factor 3                | 5.09                                           | 0.36    | 30.80                                          | 0.35        |
| CTNNB1      | catenin beta 1                             | 0.15                                           | 0.20    | 1.63                                           | 0.38        |
| EGF         | epidermal growth factor                    | 10.91                                          | 0.11    | 5.87                                           | 0.25        |
| ENG         | endoglin                                   | 48.37                                          | 0.46    | <b>37.51</b>                                   | <b>0.01</b> |
| ERBB2       | erb-b2 receptor tyrosine kinase 2          | 0.38                                           | 0.22    | 6.86                                           | 0.27        |
| FGF10       | fibroblast growth factor 10                | 70.79                                          | 0.47    | 573.23                                         | 0.12        |
| FGF2        | fibroblast growth factor 2                 | 29.35                                          | 0.09    | <b>16.80</b>                                   | <b>0.01</b> |
| FUT1        | fucosyltransferase 1                       | 155.61                                         | 0.15    | <b>641.94</b>                                  | <b>0.03</b> |
| FUT4        | fucosyltransferase 4                       | 0.64                                           | 0.89    | 7.50                                           | 0.33        |
| FZD9        | frizzled family receptor 9                 | 3.73                                           | 0.23    | 8.89                                           | 0.23        |
| GDF15       | growth differentiation factor 15           | 19.26                                          | 0.18    | 54.07                                          | 0.06        |
| GDF5        | growth differentiation factor 5            | 9.23                                           | 0.23    | 6.31                                           | 0.37        |
| GDF6        | growth differentiation factor 6            | 0.99                                           | 0.15    | 2.53                                           | 0.39        |
| GDF7        | growth differentiation factor 7            | 36.10                                          | 0.30    | 148.33                                         | 0.06        |
| GTF3A       | general transcription factor IIIA          | 3.55                                           | 0.46    | 1.85                                           | 0.30        |

|        |                                                         |              |             |              |             |
|--------|---------------------------------------------------------|--------------|-------------|--------------|-------------|
| HAT1   | histone acetyltransferase 1                             | 3.34         | 0.34        | 4.68         | 0.34        |
| HDAC1  | histone deacetylase 1                                   | 4.88         | 0.31        | 6.31         | 0.42        |
| HGF    | hepatocyte growth factor                                | 7.89         | 0.45        | 39.02        | 0.35        |
| HNF1A  | HNF1 homeobox A                                         | 12.70        | 0.09        | 6.57         | 0.42        |
| ICAM1  | intercellular adhesion molecule 1                       | 50.73        | 0.19        | 75.46        | 0.12        |
| IFNG   | interferon gamma                                        | 3.07         | 0.70        | 22.29        | 0.23        |
| IGF1   | insulin like growth factor 1                            | 6.62         | 0.37        | 664.58       | 0.37        |
| IL10   | interleukin 10                                          | 0.36         | 0.59        | 34.08        | 0.37        |
| IL1B   | interleukin 1 beta                                      | 92.49        | 0.19        | 171.88       | 0.36        |
| IL6    | interleukin 6                                           | 3.06         | 0.34        | 29.32        | 0.30        |
| INS    | insulin                                                 | 1.16         | 0.63        | 5.98         | 0.35        |
| ITGA6  | integrin subunit alpha 6                                | 0.03         | 0.22        | 10.40        | 0.32        |
| ITGAV  | integrin subunit alpha V                                | 169.17       | 0.34        | 155.34       | 0.44        |
| ITGAX  | integrin subunit alpha X                                | 15.86        | 0.31        | 69.29        | 0.32        |
| ITGB1  | integrin subunit beta 1                                 | 66.82        | 0.25        | 109.16       | 0.31        |
| JAG1   | jagged 1                                                | 309.89       | 0.15        | 654.97       | 0.35        |
| KAT2B  | lysine acetyltransferase 2B                             | 94.26        | 0.63        | 70.57        | 0.54        |
| KDR    | kinase insert domain receptor                           | 8.89         | 0.36        | 10.33        | 0.34        |
| KITLG  | KIT ligand                                              | 15.38        | 0.18        | <b>89.41</b> | <b>0.02</b> |
| LIF    | leukemia inhibitory factor                              | 2.10         | 0.24        | 2.11         | 0.49        |
| MCAM   | melanoma cell adhesion molecule                         | 41.23        | 0.28        | 175.17       | 0.58        |
| MMP2   | matrix metalloproteinase 2                              | 141.99       | 0.30        | 169.99       | 0.47        |
| NES    | nestin                                                  | 0.00         | 0.34        | 0.79         | 0.73        |
| NGFR   | nerve growth factor receptor                            | 0.22         | 0.66        | 0.12         | 0.36        |
| NOTCH1 | notch 1                                                 | 1.13         | 0.60        | 1.07         | 0.57        |
| NT5E   | 5'-nucleotidase ecto                                    | 5.83         | 0.38        | 5.44         | 0.62        |
| NUDT6  | nudix hydrolase 6                                       | 4.67         | 0.29        | 8.46         | 0.23        |
| PDGFRB | platelet derived growth factor receptor beta            | 0.46         | 0.29        | 3.10         | 0.55        |
| PIGS   | phosphatidylinositol glycan anchor biosynthesis class S | <b>21.69</b> | <b>0.04</b> | 7.62         | 0.48        |
| POU5F1 | POU class 5 homeobox 1                                  | 5.11         | 0.18        | 51.84        | 0.32        |
| PPARG  | peroxisome proliferator activated receptor gamma        | 0.31         | 0.53        | 1.10         | 0.84        |
| PROM1  | prominin 1                                              | 626.90       | 0.17        | 102.27       | 0.31        |

|         |                                              |        |      |        |      |
|---------|----------------------------------------------|--------|------|--------|------|
| PTK2    | PTK2 protein tyrosine kinase 2               | 32.47  | 0.47 | 11.59  | 0.08 |
| PTPRC   | protein tyrosine phosphatase receptor type C | 42.17  | 0.18 | 17.46  | 0.19 |
| RHOA    | ras homolog gene family member A             | 336.04 | 0.53 | 332.90 | 0.77 |
| RUNX2   | RUNX family transcription factor 2           | 2.47   | 0.75 | 2.45   | 0.91 |
| SLC17A5 | solute carrier family 17 member 5            | 4.15   | 0.85 | 206.83 | 0.38 |
| SMAD4   | SMAD family member 4                         | 51.12  | 0.47 | 395.53 | 0.06 |
| SMURF1  | SMAD specific E3 ubiquitin protein ligase 1  | 221.52 | 0.21 | 537.19 | 0.13 |
| SMURF2  | SMAD specific E3 ubiquitin protein ligase 2  | 0.07   | 0.62 | 1.44   | 0.71 |
| SOX2    | SRY-box transcription factor 2               | 3.51   | 0.48 | 6.70   | 0.37 |
| SOX9    | SRY-box transcription factor 9               | 0.17   | 0.41 | 0.88   | 0.82 |
| TBX5    | T-box transcription factor 5                 | 5.09   | 0.51 | 65.49  | 0.37 |
| TERT    | telomerase reverse transcriptase             | 7.58   | 0.47 | 13.89  | 0.26 |
| TGFB1   | transforming growth factor beta 1            | 0.17   | 0.73 | 3.95   | 0.94 |
| TGFB3   | transforming growth factor beta 3            | 0.71   | 0.47 | 13.80  | 0.25 |
| THY1    | Thy-1 cell surface antigen                   | 0.04   | 0.13 | 0.05   | 0.27 |
| TNF     | tumor necrosis factor                        | 54.61  | 0.19 | 10.59  | 0.26 |
| VCAM1   | vascular cell adhesion molecule 1            | 0.11   | 0.22 | 0.05   | 0.78 |
| VEGFA   | vascular endothelial growth factor A         | 0.07   | 0.52 | 2.19   | 0.34 |
| VIM     | vimentin                                     | 538.79 | 0.39 | 348.81 | 0.41 |
| VWF     | von Willebrand factor                        | 2.14   | 0.59 | 7.36   | 0.19 |
| WNT3A   | Wnt family member 3A                         | 0.98   | 0.25 | 6.90   | 0.36 |
| ZFP42   | ZFP42 zinc finger protein                    | 5.46   | 0.31 | 0.33   | 0.33 |

**Supplementary Table 1:** Fold change in gene expression in first trimester (n=5) and term (n=3) placental MSC relative to bone-marrow derived MSC (BM-MSC, n=3). Significant differences are highlighted in bold.
